# Supplementary material for: Consistency between trials presented at conferences, their subsequent publications and press releases
Source: HighWire-hosted journal article supplement (doi:10.1136/bmjebm-2022-111989), 2022-11-10
Supplement: bmjebm-2022-111989supp001_data_supplement.pdf [file bmjebm-2022-111989supp001_data_supplement.pdf]

**Supplementary File 1: Correlations of trial characteristics with consistency of primary efficacy endpoint definition between conference and publication abstracts**

| <b>Trial Characteristics</b>                                                                                                         | <b>Independence test<sup>1</sup> results</b> | <b>p</b> |
|--------------------------------------------------------------------------------------------------------------------------------------|----------------------------------------------|----------|
| <b>Late-breaker status</b>                                                                                                           | OR=Inf (95%CI=0.42, Inf)                     | 0.34     |
| <b>Type of study</b>                                                                                                                 | OR=0.15 (95%CI=0.01, 8.53)                   | 0.19     |
| <b>Primary purpose</b>                                                                                                               | X <sup>2</sup> =4.16, df=2                   | 0.12     |
| <b>Study Design</b>                                                                                                                  | X <sup>2</sup> =0.86, df=3                   | 0.83     |
| <b>Funder</b>                                                                                                                        | X <sup>2</sup> =5.53, df=5                   | 0.35     |
| <b>Medical conference meeting</b>                                                                                                    | X <sup>2</sup> =6.94, df=11                  | 0.80     |
| <sup>1</sup> Chi-square tests and Fisher's exact tests (when sample size was less than 10). Significance value was set at $p < 0.05$ |                                              |          |
